# Supplementary material for: Inhibition of MEK1/2 and GSK3 (2i system) affects blastocyst quality and early differentiation of porcine parthenotes
Source: PeerJ. 2019 Jan 7;6:e5840. doi: 10.7717/peerj.5840 (PMC6327883; doi:10.7717/peerj.5840)
Supplement: Supplemental Information 2 — Raw data for the figures. [file peerj-07-5840-s002.xlsx]

## Sheet: Figure 1
Figure 1B					Figure 1C					Figure 1D
Control	PD0325901(0.4μM)	CHIR99021(3μM)	2i		Control	PD0325901(0.4μM)	CHIR99021(3μM)	2i								1st(Early)						2nd(Mid)					3rd(Expanded)					4th(Hatched)
51.61	40	45	45		8341	2338	8250	14536			Control	PD0325901	CHIR99021	2i			Control	PD0325901	CHIR99021	2i		Control	PD0325901	CHIR99021	2i		Control	PD0325901	CHIR99021	2i		Control	PD0325901	CHIR99021	2i
51.43	38.89	46.67	46.67		10204	1742	6152	13692		1st(Early)	0.175	0.2044	0.146	0.1439		1-rate	0.192308	0.576923	0.153846	0.0769231		0.269231	0.538462	0.115385	0.0769231		0.210526	0.526316	0.184211	0.0789474		0.108108	0.513514	0.27027	0.108108
54.05	55.56	52.38	56.52		8098	3316	6797	11412		2nd(Mid)	0.6203	0.594	0.6448	0.5394		2-rate	0.179487	0.589744	0.128205	0.102564		0.102564	0.538462	0.179487	0.179487		0.135135	0.594595	0.162162	0.108108		0.184211	0.473684	0.236842	0.105263
43.33	55.45	55.56	56.36		7100	4192	5035	9746		3rd(Expanded)	0.1537	0.1368	0.1586	0.257		3-rate	0.178571	0.607143	0.142857	0.0714286		0.214286	0.571429	0.178571	0.0357143		0.0967742	0.709677	0.0967742	0.0967742		0.15625	0.4375	0.375	0.03125
					5224	6576	7859	6928		4th(Hatched)	0.05108	0.06485	0.05063	0.05965		4-rate	0.2	0.575	0.225	0		0.146341	0.707317	0.0731707	0.0731707		0.139535	0.744186	0.116279	0		0.0961538	0.653846	0.211538	0.0384615
					4416	5160	6382	10048								5-rate	0.105263	0.789474	0.105263	0		0.208333	0.708333	0.0833333	0		0.153846	0.653846	0.192308	0		0.111111	0.62963	0.222222	0.037037
					4362	5740	10400	10499								6-rate	0.166667	0.5	0.285714	0.047619		0.285714	0.5	0.190476	0.0238095		0.14	0.64	0.2	0.02		0.207547	0.528302	0.226415	0.0377358
					4724	4106	6012	10660
					5348	4250	9086	9597
					6944	5480	7240	9676
					2604	4604	7628	14080
					5478	3856	6444	6628
					4888	4904	4582	8492
					6224	3674	5272	5036
					8242	5222	4665	6864
					9752	8250	7020	13972
					5660	8744	6862	8020
					7080	5884	5408	11497
					6714	4420	11012	7320
					8554	5268	4724	4780
					5413	5944	9600	4584
					10468	4783	6944	5020
					11406	5342	7016	4962
					7858	4421	4656	5856
					4106	5145	5090	4018
					5206	7016	7994	3108
					7523	8187	8016	6586
					4905	13692	9088	6020
					4656	9155	9708	5206
					1822	7693	11032	13766
					3004	15670	11786	9764
					4071	4153	8090	8652
					8021	13980	4784	9940
					6943	13865	10812	6508
					4090	10008	10852	13473
					7060	4048	7632	7272
					12664	4315	9410	8993
					6508	3412	6668	5866
					7976	6714	13216	7084
					6576	3632	6047	5608
					5417	8353	11598	9336
					6836	12546	10009	5084
					4645	3576	4168	7320
					8224	2377	9661	10211
					8604	3902	3313	7174
					6924	3856	2780	9667
						4838	8568	8472
						4832	10156	6628
						5206	5594	10198
						6108	8738	7482
						4605	2602	10304
							5552	9404
							3316	11516
							3831
							3948
							5925
							8906
							7934
							6564
							9584
							4470
							5928
							6714
							4566
							4362
							5532
							5616
							4966
							9704
							5896

## Sheet: Figure 2
Figure 2B					Figure 2C					Fig 2D
Control	PD0325901(0.4μM)	CHIr99021(3μM)	2i		Control	PD0325901(0.4μM)	CHIR99021(3μM)	2i		Bax	Con	1	0
60	66	64	74		8	1	1	4			2i	1.08854	0.127236
59	68	58	62		3	7	1	3		Bcl-xl	Con	1	0
62	66	57	65		1	1	4	0			2i	1.07543	0.0549882
59	57	58	66		3	5	2	3		Bcl2	Con	1	0
63	74	58	60		6	0	4	3			2i	1.44602	0.065133
57	53	74	78		4	3	0	0
56	57	59	66		0	7	5	3
51	61	65	81		2	2	5	2
52	51	63	78		4	6	0	4
64	60	58	84		2	1	2	1
61	73	61	68		3	0	2	3
50	50	54	61		6	8	1	1
52	61	59	68		7	8	3	4
61	57	55	80		5	5	4	1
59	53	57	70		7	7	4	1
63	61	74	70		5	2	4	1
57	51	59	74		5	4	0	2
56	60	65	61		6	4	1	4
51	73	63	66		4	13	2	4
52	50	58	81		6	5	1	4
64	61	61	78		5	5	4	0
61	57	54	84		5	4	5	0
50	53	59			5	6	6	0
52		55			7	5	7	1
61		57

## Sheet: Figure 3
Figure 3B					Figure 3D
Control	PD0325901(0.4μM)	CHIr99021(3μM)	2i		Control	PD0325901(0.4μM)	CHIR99021(3μM)	2i
19.05	19.64	20	75.93		17.39	15	16.67	17.46
18.64	10.34	39.62	59.52		14	14.63	20.69	27.91
13.73	40.48	40	55		11.11	18	25.93	26.67
20	39.62	46.67	56.14		22.22	23.81	18.33	10.2
22.22	15	44.9	39.62		15	13.33	15.52	31.58
12	42.86	28	20		13.79	18.33	9.26	22.22
23.81	16	48.94	40.98		10	16.67	12.24	25.42
40	10.71	45.1	75.51		12.73	14.29	15.52	21.15
12.24	19.64	20	75.93		16.67	20	18.52	25.42
19.15	10.34	39.62	59.52		13.73	23.53	19.23	15.38
23.53	40.48	40	55		10.53	25	8.62	20
16.67	39.62	46.67	56.14		12.9	11.43	5.56	7.84
8.7	15	44.9	39.62		13.04	16.67	7.69	24.19
63.49	42.86	28	20		25	25	13.16	22.73
12.24	16	48.94	40.98		9.09	19.61	15.52	23.73
19.15	10.71	45.1	38.78		13.46	23.53	27.78	6.67
23.53	16	45.1	52.63		18.87	19.67	28.57	11.9
16.67	10.71	20	39.62		10.53	12	18.33	30.19
8.7	19.64	39.62	18.18		14.29	12.24	17.24	29.82
11.54	10.34	40	40.98		18.18	5.77	11.11	25
29.41	40.48	46.67	75.51		16.33	3.85	15.25	17.31
16.13	11.54	25.42	13.11		7.35	7.69	9.62	29.23
			40.82		8.47	10	8.62
						10.34	7.41

## Sheet: Figure 4
Figure 4
GATA4	Con	1	0.0561284
	2i	0.750427	0.0569837
GATA6	Con	1	0.0912536
	2i	0.775585	0.0262787
OCT4	Con	1	0.0519626
	2i	1.40975	0.0994105
SOX2	Con	1	0.158022
	2i	1.35645	0.140193
Sox7	Con	1	0.14651
	2i	1.17269	0.13407
NANOG	Con	1	0.111045
	2i	1.1678	0.107582
CDX2	Con	1	0.411952
	2i	0.896024	0.305262
DNMT1A	Con	1	0.0625782
	2i	0.691326	0.0656188
DNMT3A	Con	1	0.0722037
	2i	0.491061	0.0342335
P-SUV39H1	Control	1	0.0874462
	2i	1.06842	0.275713
P-SUV39H2	Control	1	0.246636
	2i	0.593768	0.100327
TET1	Con	1	0.0461758
	2i	0.952121	0.291431
JMJD2C	Con	1.30659	0.273357
	2i	0.975925	0.0463489
PRDM14	Con	0.339834	0.0915686
	2i	1	0.261618
H19	Con	1	0.510289
	2i	1.02988	0.429226
Igf2R	Con	1.03391	0.0471659
	2i	0.881266	0.0605696
